# Supplementary material for: The MitoLuc Assay System for Accurate Real-Time Monitoring of Mitochondrial Protein Import Within Mammalian Cells
Source: PubMed Central journal article supplement (PMC7616392; doi:10.1016/j.jmb.2023.168129), 2023-04-25
Supplement: EMS198153-supplement-Appendix.pdf [file EMS198153-supplement-Appendix.pdf]

### **Appendix A. Supplementary Data**

Supplementary data to this article can be found online at <https://doi.org/10.1016/j.jmb.2023.168129>.
